# Supplementary material for: Catalytic Ability of K- and Co-Promoted Oxo-Re and Oxo-ReMo Nanosized Compositions for Water–Gas Shift Reaction
Source: MDPI journal article supplement (doi:10.3390/catal13111443), 2023-11-15
Supplement: s1 [file s1]

Supplementary material

# Catalytic Ability of K- and Co-Promoted Oxo-Re and Oxo-ReMo Nanosized Compositions for Water–Gas Shift Reaction

Dimitrinka Nikolova <sup>1,\*</sup>, Ivan Ivanov <sup>1</sup>, John Vakros <sup>2</sup>, Margarita Gabrovska <sup>1</sup>, Jugoslav Krstić <sup>3</sup>, Peter Tzvetkov <sup>4</sup>, Evangeliya Petrova <sup>1</sup>, Gabriella Zarkova <sup>1</sup>, Tanya Petrova <sup>1</sup> and Tatyana Tabakova <sup>1,\*</sup>

<sup>1</sup> Institute of Catalysis, Bulgarian Academy of Sciences, 1113 Sofia, Bulgaria; bogoev@ic.bas.bg (I.I.); margo@ic.bas.bg (M.G.); evpetrova2020@gmail.com (E.P.); gabbyto18@gmail.com (G.Z.); silberbarren@abv.bg (T.P.)

<sup>2</sup> Department of Chemical Engineering, University of Patras, GR-26504 Patras, Greece; vakros@chemistry.upatras.gr

<sup>3</sup> ICTM, Department of Catalysis and Chemical Engineering, University of Belgrade, 11000 Belgrade, Serbia; jugoslav.krstic@gmail.com

<sup>4</sup> Institute of General and Inorganic Chemistry, Bulgarian Academy of Sciences, 1113 Sofia, Bulgaria; p-tzvetkov@gmx.net

\* Correspondence: dimi\_nik@abv.bg or dimi@ic.bas.bg (D.N.); tabakova@ic.bas.bg (T.T.); Tel.: +359-2-979-2528 (D.N.); +359-2-979-3578 (T.T.)

**Table S1.** Catalyst composition determined by XRF.

| Sample/spot     | Element concentration (wt %) |              |              |              |                                |             |                  |                  |
|-----------------|------------------------------|--------------|--------------|--------------|--------------------------------|-------------|------------------|------------------|
|                 | Re                           | Co           | Mo           | K            | Re <sub>2</sub> O <sub>7</sub> | CoO         | MoO <sub>3</sub> | K <sub>2</sub> O |
| <b>CoRe</b>     |                              |              |              |              |                                |             |                  |                  |
| spot 1          | 86.11                        | 13.89        | -            | -            |                                |             | -                | -                |
| spot 2          | 85.68                        | 14.32        | -            | -            |                                |             | -                | -                |
| <b>Average</b>  | <b>85.90</b>                 | <b>14.11</b> | -            | -            | <b>15.76</b>                   | <b>2.53</b> | -                | -                |
| <b>CoReMo</b>   |                              |              |              |              |                                |             |                  |                  |
| spot 1          | 47.27                        | 15.82        | 36.81        | -            |                                |             |                  |                  |
| spot 2          | 50.75                        | 19.60        | 29.65        | -            |                                |             |                  |                  |
| <b>Average</b>  | <b>49.01</b>                 | <b>17.71</b> | <b>33.23</b> | -            | <b>12.24</b>                   | <b>4.32</b> | <b>9.57</b>      | -                |
| <b>K-CoRe</b>   |                              |              |              |              |                                |             |                  |                  |
| spot 1          | 54.20                        | 17.22        | -            | 28.58        |                                |             |                  |                  |
| spot 2          | 46.04                        | 20.09        | -            | 33.87        |                                |             |                  |                  |
| <b>Average</b>  | <b>50.12</b>                 | <b>18.66</b> | -            | <b>31.23</b> | <b>11.90</b>                   | <b>4.34</b> | -                | <b>6.86</b>      |
| <b>K-CoReMo</b> |                              |              |              |              |                                |             |                  |                  |
| spot 1          | 22.41                        | 14.20        | 32.34        | 31.05        |                                |             |                  |                  |
| spot 2          | 29.45                        | 13.62        | 27.02        | 29.91        |                                |             |                  |                  |
| <b>Average</b>  | <b>25.93</b>                 | <b>13.91</b> | <b>29.68</b> | <b>30.48</b> | <b>7.87</b>                    | <b>4.13</b> | <b>10.40</b>     | <b>8.58</b>      |

After deposition of potassium, deviation from nominal values is related to the effect of X-ray depth penetration.

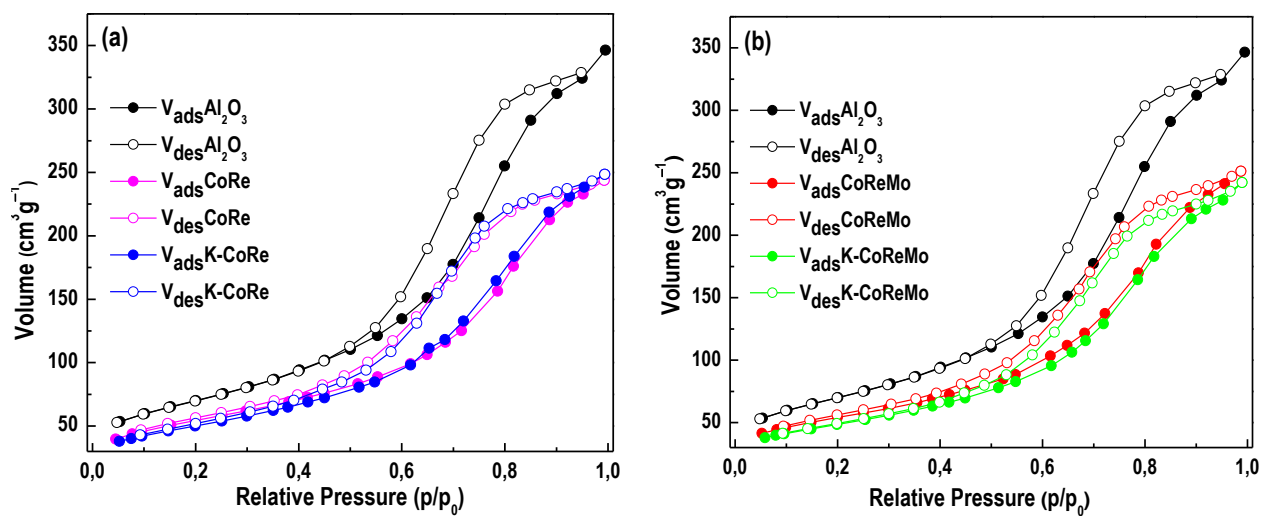

**Figure S1.** N<sub>2</sub> adsorption-desorption isotherms: (a) Al<sub>2</sub>O<sub>3</sub> support, CoRe and K-CoRe catalysts; (b) Al<sub>2</sub>O<sub>3</sub> support, CoReMo and K-CoReMo catalysts.

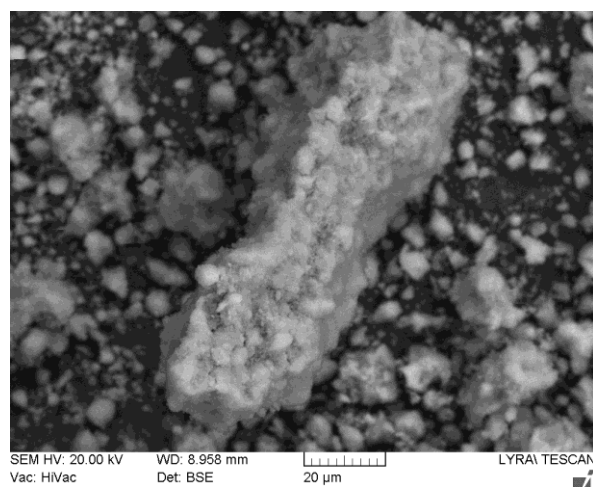

**Figure S2.** SEM image of γ-Al<sub>2</sub>O<sub>3</sub> support

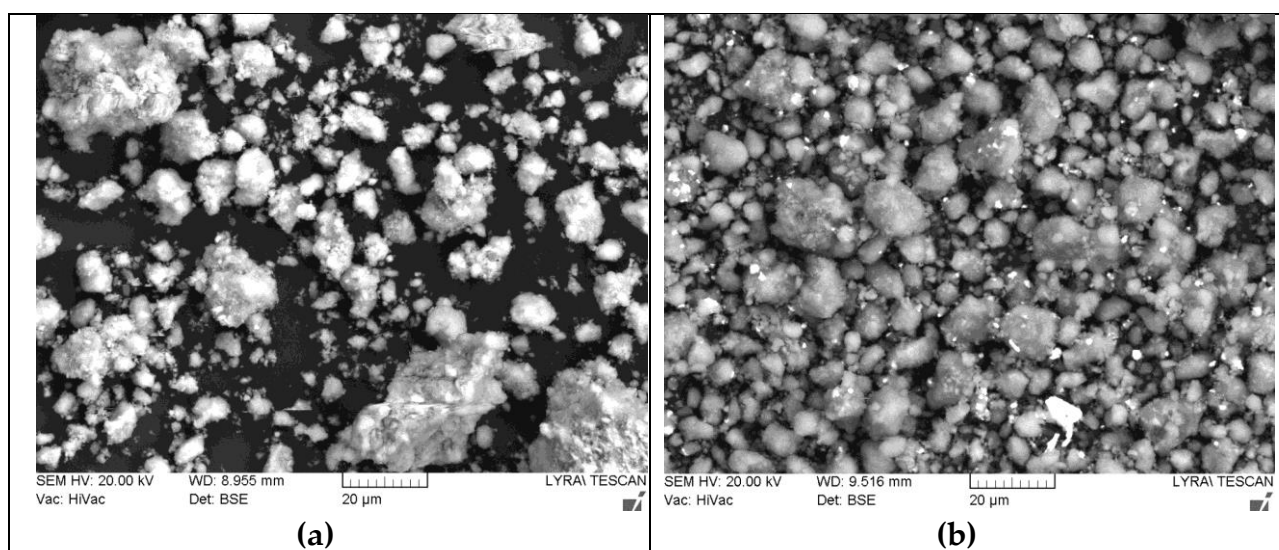

**Figure S3.** SEM image of: (a) CoRe; (b) K-CoRe.

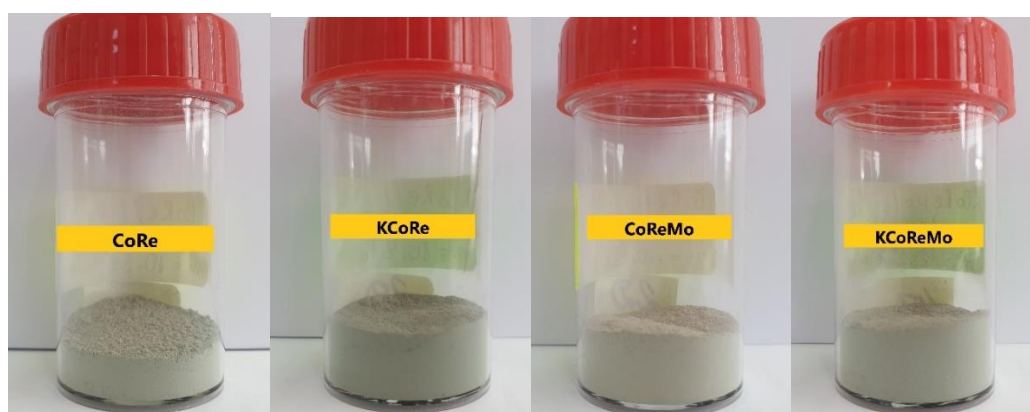

**Figure S4.** Photos displaying colors of oxide CoRe, K-CoRe, CoReMo, and K-CoReMo catalyst systems.

**Table S2.** Data on the formed oxide structures

| Sample          | Formed metal-oxide structures                                                                                                                                                                                                                                                                                                             |
|-----------------|-------------------------------------------------------------------------------------------------------------------------------------------------------------------------------------------------------------------------------------------------------------------------------------------------------------------------------------------|
| <b>CoRe</b>     | $\text{ReO}_4^-$ , non-stoichiometric spinel-like mixed $\text{Co}^{2+}(\text{Co}^{3+}, \text{Al}^{3+})_2\text{O}_4$ oxide, bed formed $\text{Co}_3\text{O}_4$ ( $\text{CoO} \cdot \text{Co}_2\text{O}_3$ ) and $\text{CoAl}_2\text{O}_4$ spinel structures; $\text{ReO}_3\text{--O--ReO}_3$ and $\text{Co--Re--O--(Al)}$ surface species |
| <b>K-CoRe</b>   | better formed $\text{Co}_3\text{O}_4$ ( $\text{CoO} \cdot \text{Co}_2\text{O}_3$ ) and $\text{CoAl}_2\text{O}_4$ spinel structures; $\text{K}(\text{ReO}_4)$ ; $\text{K--Co--Re--O--(Al)}$ surface species                                                                                                                                |
| <b>CoReMo</b>   | mixture of isolated molybdate $\text{MoO}_4^-$ and polymolybdate $\text{--MoO}_6^-$ structures; $\text{Co}_3\text{O}_4$ , $\text{CoAl}_2\text{O}_4$ , $\text{Co--Re--Mo--O--(Al)}$ and $\text{CoMoO}_4$ structures                                                                                                                        |
| <b>K-CoReMo</b> | mixture of isolated molybdate $\text{MoO}_4^-$ and polymolybdate $\text{--MoO}_6^-$ structures; $\text{K}_2\text{MoO}_4$ , $\text{K--Co--Re--Mo--O--(Al)}$ and $\text{CoMoO}_4$ structures                                                                                                                                                |

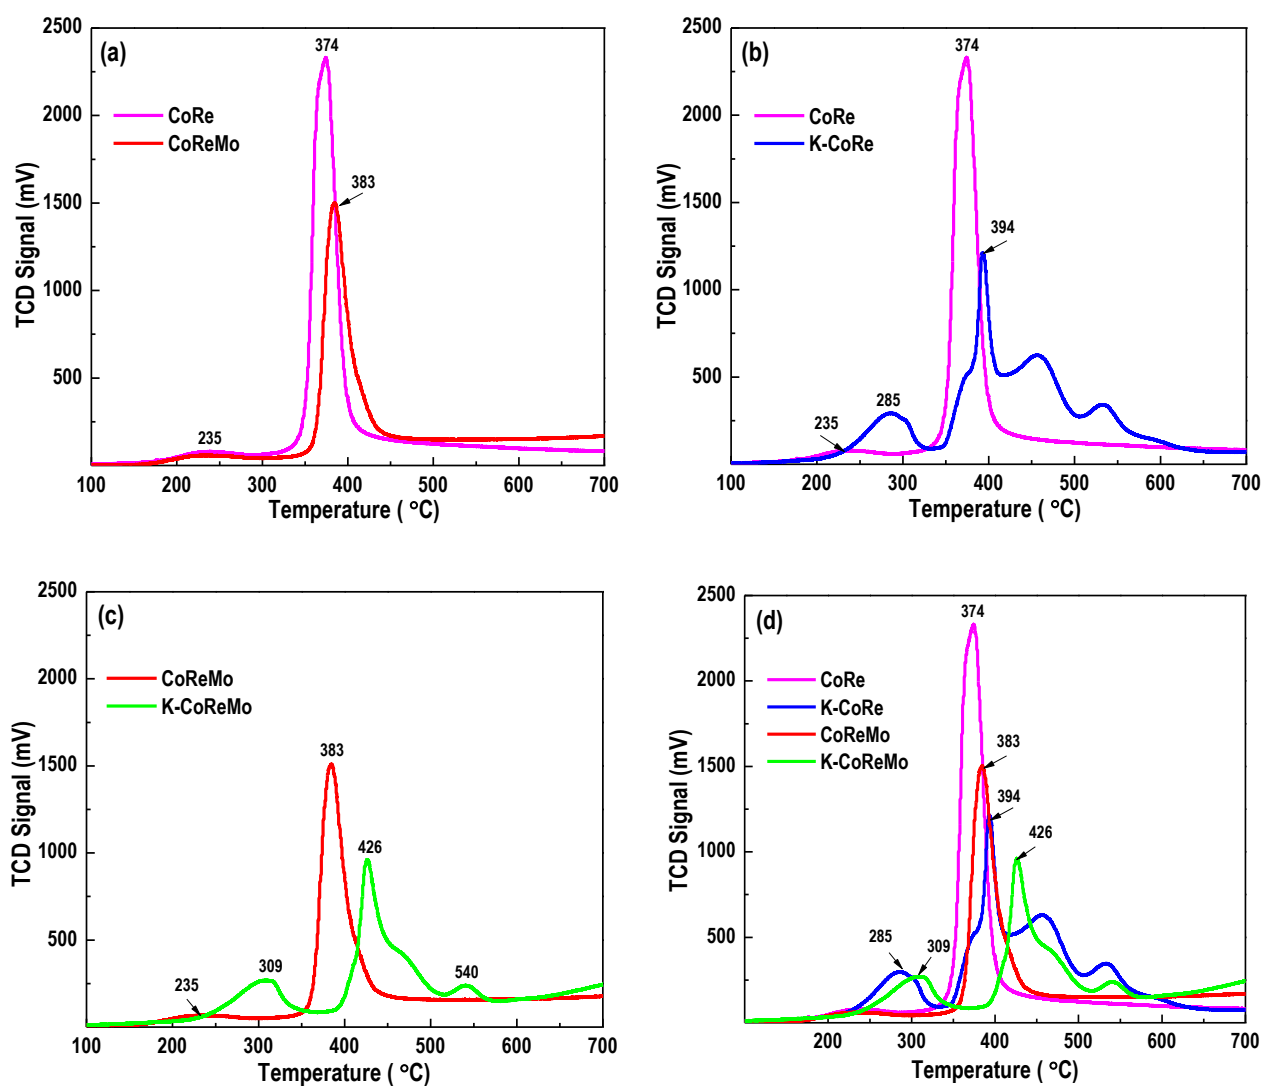

**Figure S5.** Comparative presentation of H<sub>2</sub>-TPR profiles: (a) CoRe and CoReMo; (b) CoRe and K-CoRe; (c) CoReMo and K-CoReMo; (d) CoRe, K-CoRe, CoReMo, and K-CoReMo.
